# Supplementary material for: Synthesis of Highly Monodisperse Nickel and Nickel Phosphide Nanoparticles
Source: MDPI journal article supplement (doi:10.3390/nano12183198), 2022-09-14
Supplement: s1 [file s1]

**Supplementary Materials for:**

Synthesis of Highly Monodisperse Nickel and Nickel  
Phosphide Nanoparticles

Hyungjin Cho, Nohyun Lee and Byung Hyo Kim \*

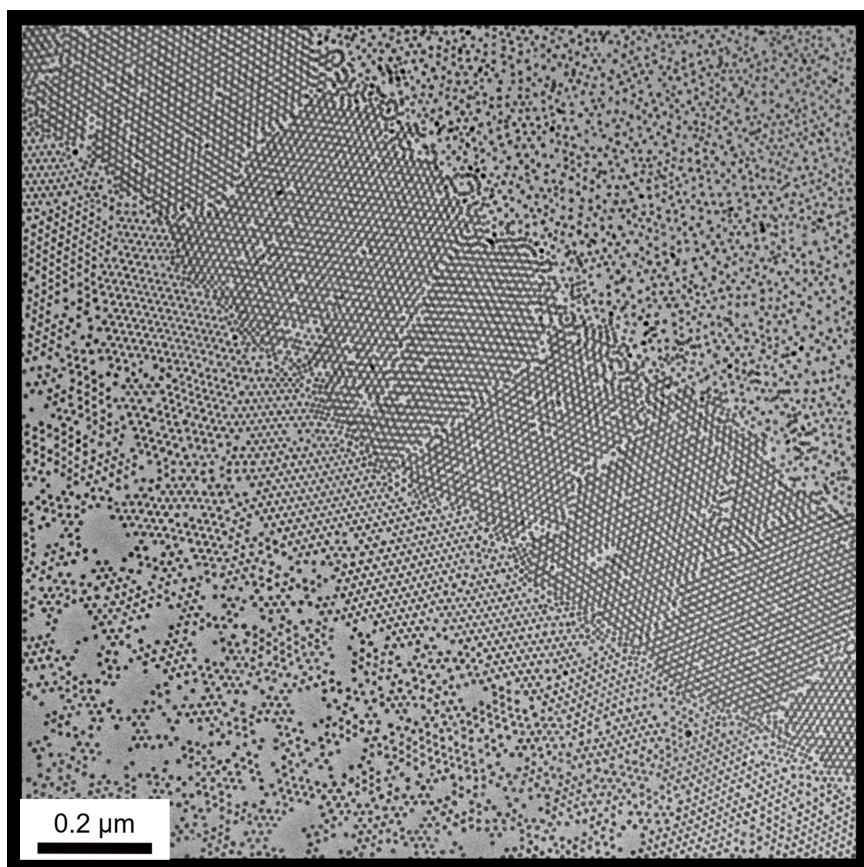

**Figure S1.** Large area image of 9 nm Ni nanoparticles. Scale bar is 0.2  $\mu\text{m}$ .

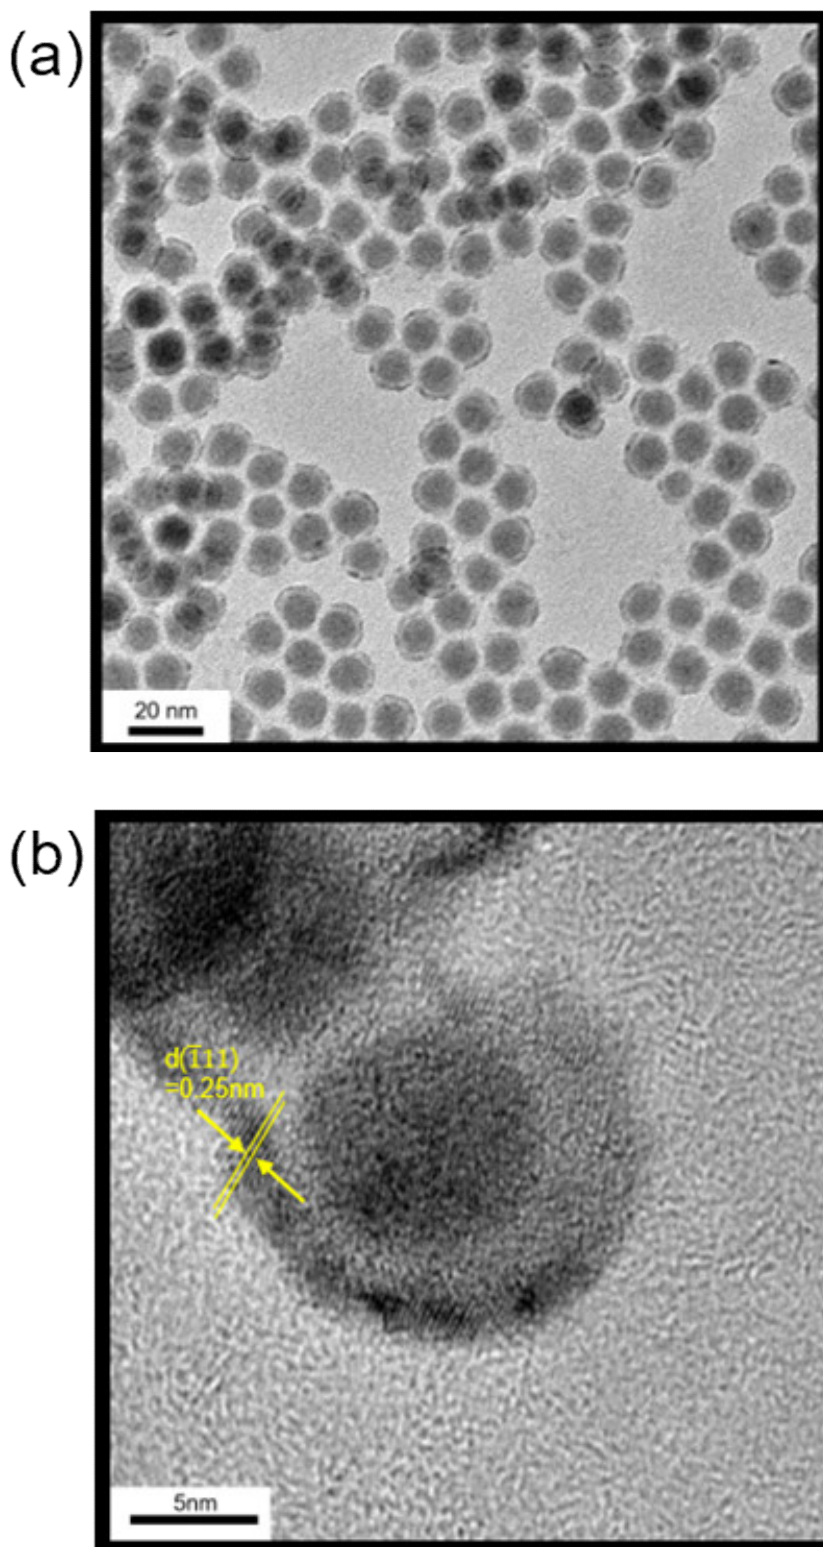

**Figure S2.** The polycrystalline structure of Ni core and NiO shell image shows that there is Kirkendall reaction on the Ni particles. Being exposed to air for a month, 13 nm Ni nanoparticles changed to 16 nm Ni/NiO nanoparticles. Scale bar is (a) 20 nm, (b) 5 nm.

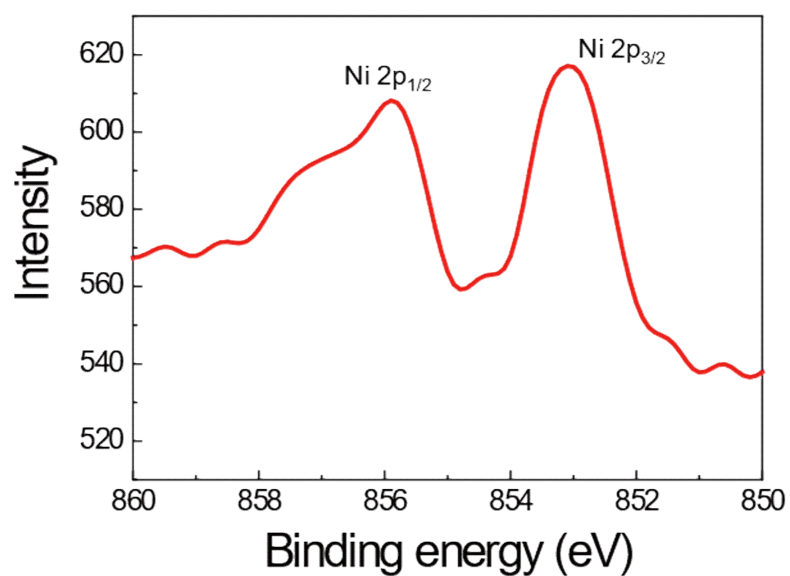

**Figure S3.** XPS spectrum in the region of Ni 2p core level obtained from 9 nm Ni nanoparticles. 853 eV peak represent Ni(0) metal, on the other hand, 856 eV peak is more oxidized Ni(II) peak. XPS data exhibit that there are Ni<sup>2+</sup> ions on the surfaces of particles.

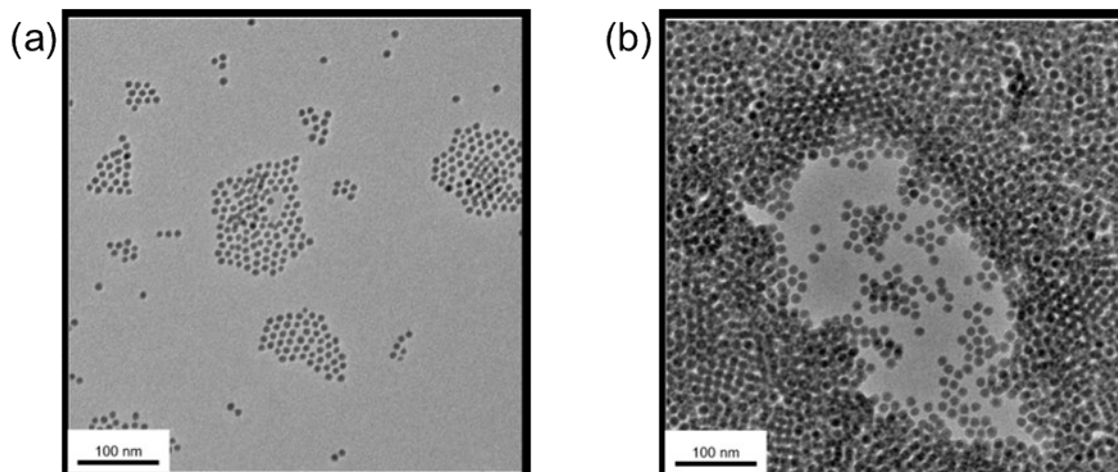

**Figure S4.** TEM images of (a) 10 nm and (b) 13 nm Ni nanoparticles, synthesized by using TOP and TBP (as surfactant), respectively. (Precursor concentration = 200 mM, solvent: dioctyl ether, aging temperature: 250 °C) Scale bar is 100 nm

(a)

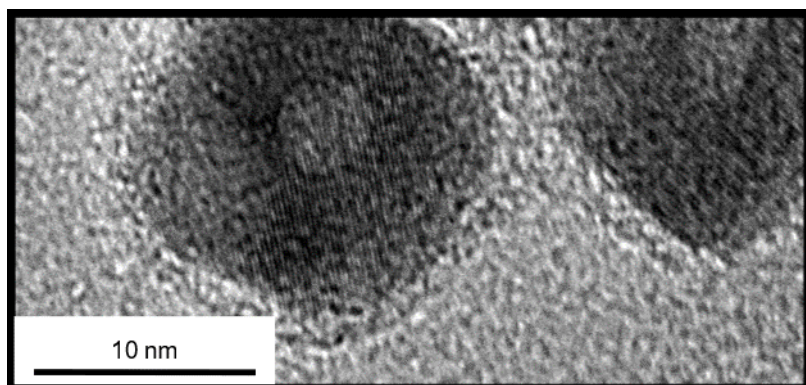

(b)

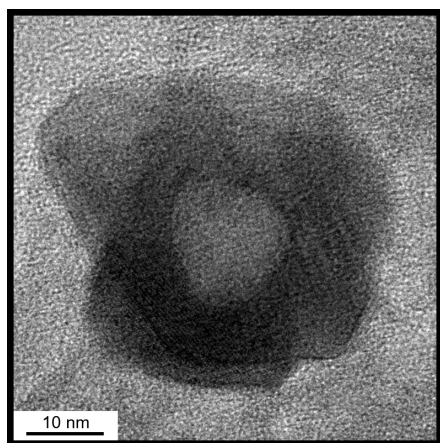

**Figure S5.** HRTEM images of hollow  $\text{Ni}_{12}\text{P}_5$  nanoparticles synthesized at 280 °C. (a) Precursor concentration = 200 mM, surfactant: TBP, solvent: dioctyl ether. (b) Precursor concentration = 200 mM, surfactant: TOP, solvent: dioctyl ether. Due to the particle overlap, the size of particles looks large.

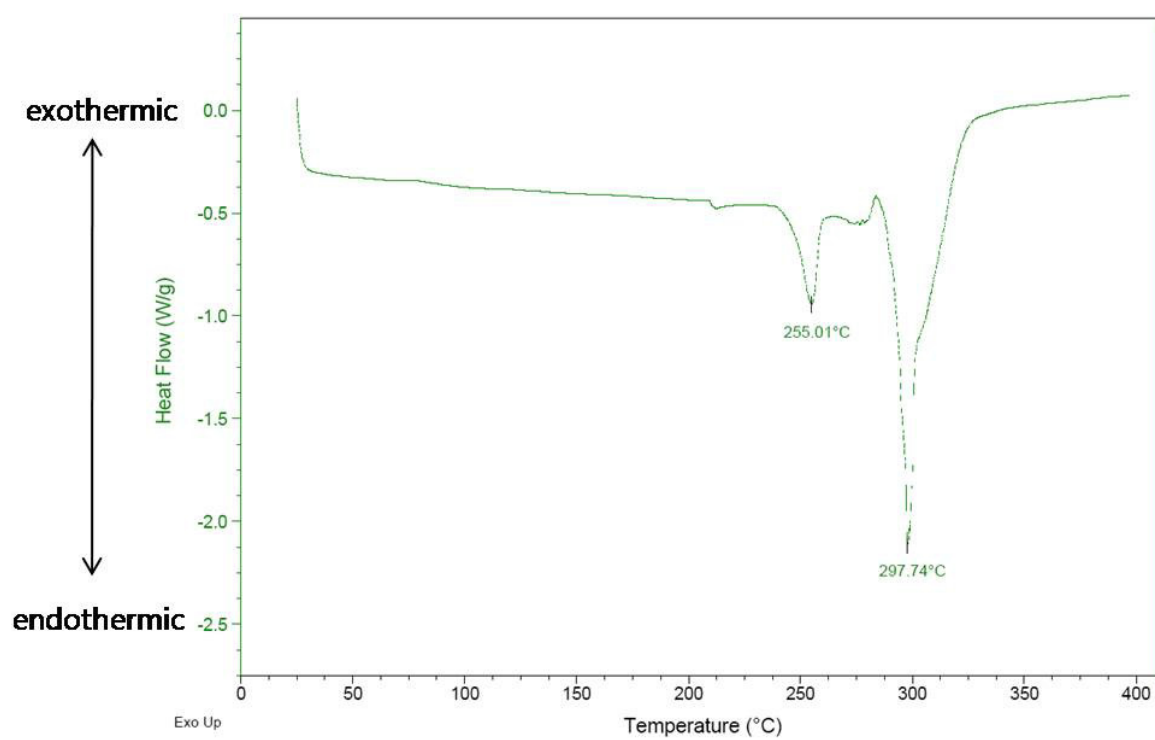

**Figure S6.** DSC data of TBP. Endothermic peaks that indicate the dissociation of carbon-phosphorus bond lie at 255 °C and 298 °C.



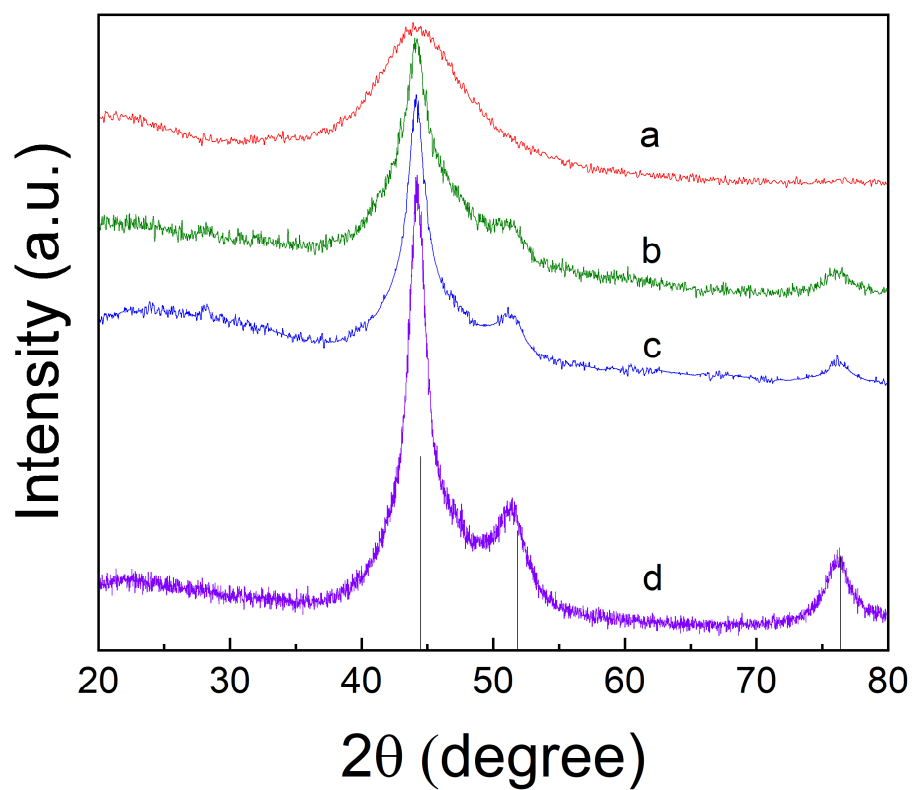

**Figure S7.** XRD patterns of (a) 13 nm, (b) 15 nm, (c) 17 nm, and (d) 18 nm Ni nanoparticles synthesized when the precursor to phosphine ratio is 1:1.2, 1:1.0, 1:0.8, and 1:0.60, respectively. (Precursor concentration = 200 mM, surfactant: TBP, aging temperature: 250°C)



**Table S1.** Lattice parameters of Ni nanoparticles obtained by varying precursor to phosphine ratio. The values from bulk Ni metal are also listed.

| precursor<br>:<br>phosphine | size (nm) | (111) peak | d spacing<br>(Å) <sup>a</sup> | lattice<br>parameter<br>(Å) <sup>a</sup> | (220) peak | d spacing<br>(Å) <sup>b</sup> | lattice<br>parameter<br>(Å) <sup>b</sup> |
|-----------------------------|-----------|------------|-------------------------------|------------------------------------------|------------|-------------------------------|------------------------------------------|
| 1.0 : 1.2                   | 13 nm     | 43.9       | 2.06                          | 3.57                                     | 76.7       | 1.24                          | 3.51                                     |
| 1.0 : 1.0                   | 15 nm     | 44.0       | 2.05                          | 3.56                                     | 76.5       | 1.24                          | 3.52                                     |
| 1.0 : 0.8                   | 17 nm     | 44.2       | 2.05                          | 3.55                                     | 76.4       | 1.25                          | 3.52                                     |
| 1.0 : 0.6                   | 18 nm     | 44.3       | 2.04                          | 3.54                                     | 76.1       | 1.25                          | 3.53                                     |
| Bulk                        |           | 44.5       | 2.03                          | 3.52                                     | 76.4       | 1.25                          | 3.52                                     |

<sup>a</sup>The d spacing and lattice parameters are calculated on the basis of (111) peak position of XRD pattern. <sup>b</sup>The d spacing and lattice parameters are calculated on the basis of (220) peak position of XRD pattern.

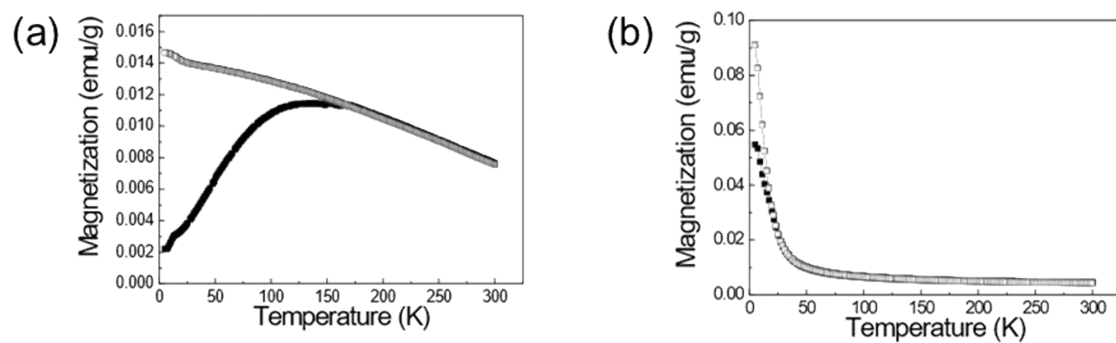

**Figure S8.** Temperature dependence of magnetization measured with 100 Oe for (a) 13 nm and (b) 18 nm Ni nanoparticles after zero-field cooling (■) and field cooling (□). Blocking temperature is (a) 19 K and (b) 167 K.

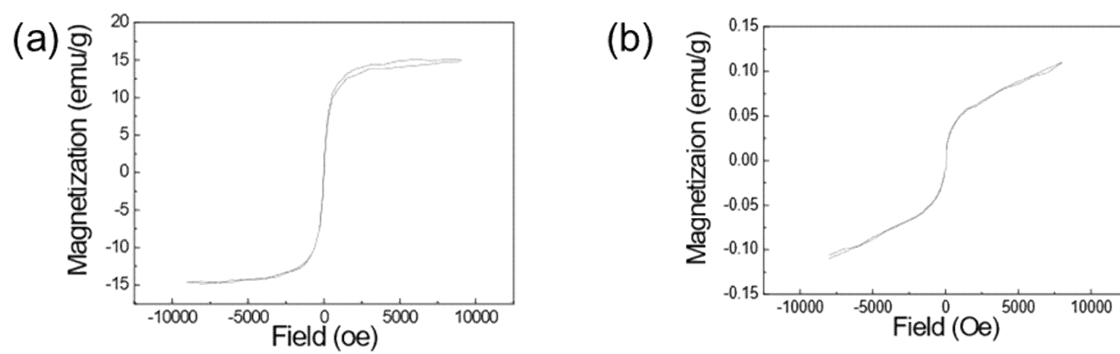

**Figure S9.** M-H curve of Ni nanoparticles measured by SQUID at 300 K for (a) 18 nm and (b) 13 nm Ni particles.

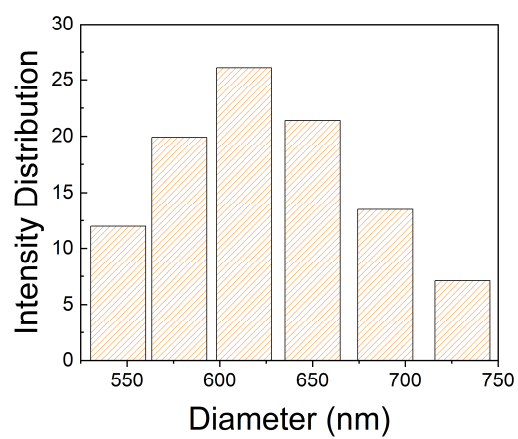

**Figure S10.** The hydrodynamic size distribution of nickel nanoparticles after the ligand exchange process as measured by dynamic light scattering (DLS). The average size of the ligand exchanged particles is 624.5 nm.
